# Supplementary material for: Characterisation of NLRP3 pathway-related neuroinflammation in temporal lobe epilepsy
Source: PubMed Central journal article supplement (PMC9380933; doi:10.1371/journal.pone.0271995), 2022-08-16
Supplement: pone.0271995.s004.pdf [file pone.0271995.s004.pdf]

**S1 Table. Distribution of clinical parameters with the “lesion associated” and hippocampal sclerosis (HS) patient groups**

|                                                                                               | Lesion associated         | (n) | HS                        | (n) |
|-----------------------------------------------------------------------------------------------|---------------------------|-----|---------------------------|-----|
| Number of patients                                                                            | 34                        |     | 78                        |     |
| Gender (male vs. female)                                                                      | 64.7% vs. 35.3%           | 34  | 47.4% vs. 52.6%           | 78  |
| Age at seizure onset (years)                                                                  | 10.7 ± 1.5                | 34  | 11.5 ± 1.5                | 78  |
| Seizure frequency per month                                                                   | 16.5 ± 6.0                | 34  | 13.9 ± 2.9                | 78  |
| Drug therapy (sodium-channel blocker monotherapy vs. LEV combination vs. Non LEV-combination) | 17.6% vs. 35.3% vs. 47.1% | 34  | 20.5% vs. 37.2% vs. 42.3% | 78  |
| Age at epilepsy surgery (years)                                                               | 23.0 ± 2.8                | 34  | 35 ± 1.7                  | 78  |
| Post-operative outcome (Engel IA vs. Engel IVB)                                               | 45.5% vs. 54.5%           | 33  | 61.3% vs. 38.7%           | 75  |

LEV = Levetiracetam

Engel class IA: completely seizure free; class IVB: no seizure freedom
