# Supplementary material for: Characterisation of NLRP3 pathway-related neuroinflammation in temporal lobe epilepsy
Source: PubMed Central journal article supplement (PMC9380933; doi:10.1371/journal.pone.0271995), 2022-08-16
Supplement: pone.0271995.s005.pdf [file pone.0271995.s005.pdf]

**S2 Table. Statistical analysis**

| <b>Fig. 1B: Control vs SE Pilo: 2way ANOVA</b>                             |                                   |                   |                                     |                   |
|----------------------------------------------------------------------------|-----------------------------------|-------------------|-------------------------------------|-------------------|
|                                                                            | Group comparison (Control vs. SE) |                   | Time comparison (72h, 10d, 28d)     |                   |
|                                                                            | P value                           | F(DFn, DFd)       | P value                             | F(DFn, DFd)       |
| <i>Nlrp3</i>                                                               | **** P<0.0001                     | F(1,27) = 93.33   | **** P<0.0001                       | F(2,27) = 32.01   |
| <i>Asc</i>                                                                 | **** P<0.0001                     | F(1,28) = 87.85   | **** P<0.0001                       | F(2,28) = 20.93   |
| <i>Casp1</i>                                                               | **** P<0.0001                     | F(1,27) = 25.63   | *** P=0.0002                        | F(2,27) = 12.30   |
| <i>Tlr4</i>                                                                | **** P<0.0001                     | F(1,28) = 155.7   | **** P<0.0001                       | F(2,28) = 29.54   |
| <i>NfkB2</i>                                                               | **** P<0.0001                     | F(1,28) = 90.29   | **** P<0.0001                       | F(2,28) = 27.38   |
| Sidak's post hoc test: *p < 0.05, **p < 0.01, ***p < 0.001, ****p < 0.0001 |                                   |                   |                                     |                   |
| <b>Fig. 1C: Control vs SE KA: 2way ANOVA</b>                               |                                   |                   |                                     |                   |
|                                                                            | Group comparison (Control vs. SE) |                   | Time comparison (72h, 5d, 10d, 28d) |                   |
|                                                                            | P value                           | F(DFn, DFd)       | P value                             | F(DFn, DFd)       |
| <i>Nlrp3</i>                                                               | **** P<0.0001                     | F(1,82) = 53.87   | ** P=0.0034                         | F(3,82) = 4.917   |
| <i>Asc</i>                                                                 | **** P<0.0001                     | F(1,70) = 32.22   | P=0.0771                            | F(3,70) = 2.378   |
| <i>Casp1</i>                                                               | **** P<0.0001                     | F(1,74) = 55.27   | *** P=0.0042                        | F(3,74) = 4.785   |
| <i>Tlr4</i>                                                                | **** P<0.0001                     | F(1,82) = 105.9   | *** P=0.001                         | F(3,82) = 5.964   |
| <i>NfkB2</i>                                                               | **** P<0.0001                     | F(1,70) = 34.54   | ** P=0.0029                         | F(3,70) = 5.138   |
| Sidak's post hoc test: *p < 0.05, **p < 0.01, ***p < 0.001, ****p < 0.0001 |                                   |                   |                                     |                   |
| <b>Fig. 2A/B: Control vs SE Pilo: 2way ANOVA</b>                           |                                   |                   |                                     |                   |
|                                                                            | Group comparison (Control vs. SE) |                   | Time comparison (72h, 10d, 28d)     |                   |
|                                                                            | P value                           | F(DFn, DFd)       | P value                             | F(DFn, DFd)       |
| <i>Il1b</i>                                                                | *** P=0.0003                      | F(1,23) = 18.36   | * P=0.0204                          | F(2,23) = 4.629   |
| <i>Il18</i>                                                                | P=0.97                            | F(1,27) = 0.00198 | P=0.0771                            | F(2,27) = 1.745   |
| Sidak's post hoc test: *p < 0.05, **p < 0.01, ***p < 0.001, ****p < 0.0001 |                                   |                   |                                     |                   |
| <b>Fig. 3A/B: Control vs SE KA: 2way ANOVA</b>                             |                                   |                   |                                     |                   |
|                                                                            | Group comparison (Control vs. SE) |                   | Time comparison (72h, 5d, 10d, 28d) |                   |
|                                                                            | P value                           | F(DFn, DFd)       | P value                             | F(DFn, DFd)       |
| <i>Il1b</i>                                                                | **** P<0.0001                     | F(1,65) = 77.05   | ** P=0.0016                         | F(3,65) = 5.707   |
| <i>Il18</i>                                                                | P=0.3261                          | F(1,69) = 0.978   | ***P=0.0007                         | F(3,69) = 6.441   |
| Sidak's post hoc test: *p < 0.05, **p < 0.01, ***p < 0.001, ****p < 0.0001 |                                   |                   |                                     |                   |
| <b>Fig. 4A: Control vs SE Pilo: 2way ANOVA</b>                             |                                   |                   |                                     |                   |
|                                                                            | Group comparison (Control vs. SE) |                   | Time comparison (72h, 10d, 28d)     |                   |
|                                                                            | P value                           | F(DFn, DFd)       | P value                             | F(DFn, DFd)       |
| <i>Aif1</i>                                                                | **** P<0.0001                     | F(1,26) = 158.5   | **** P<0.0001                       | F(2,26) = 30.03   |
| <i>Gfap</i>                                                                | **** P<0.0001                     | F(1,24) = 123.5   | ** P=0.0039                         | F(2,24) = 7.041   |
| Sidak's post hoc test: *p < 0.05, **p < 0.01, ***p < 0.001, ****p < 0.0001 |                                   |                   |                                     |                   |
| <b>Fig. 4B: Control vs SE Pilo: 2way ANOVA</b>                             |                                   |                   |                                     |                   |
|                                                                            | Group comparison (Control vs. SE) |                   | Time comparison (72h, 10d, 28d)     |                   |
|                                                                            | P value                           | F(DFn, DFd)       | P value                             | F(DFn, DFd)       |
| <i>Aif1</i>                                                                | **** P<0.0001                     | F (1, 12) = 54,66 | ***P=0.0003                         | F (2, 12) = 16,69 |
| <i>Gfap</i>                                                                | **** P<0.0001                     | F (1, 12) = 64,95 | P=0.1181                            | F (2, 12) = 2,566 |
| Sidak's post hoc test: *p < 0.05, **p < 0.01, ***p < 0.001, ****p < 0.0001 |                                   |                   |                                     |                   |
| <b>Fig. 5A: Control vs SE KA: 2way ANOVA</b>                               |                                   |                   |                                     |                   |
|                                                                            | Group comparison (Control vs. SE) |                   | Time comparison (72h, 5d, 10d, 28d) |                   |
|                                                                            | P value                           | F(DFn, DFd)       | P value                             | F(DFn, DFd)       |
| <i>Aif1</i>                                                                | **** P<0.0001                     | F(1,52) = 35.35   | *P=0.0123                           | F(2,52) = 4.8     |
| <i>Gfap</i>                                                                | **** P<0.0001                     | F(1,57) = 37.51   | ** P=0.0089                         | F(2,57) = 5.134   |
| Sidak's post hoc test: *p < 0.05, **p < 0.01, ***p < 0.001, ****p < 0.0001 |                                   |                   |                                     |                   |
| <b>Fig. 5B: Control ipsi vs SE ipsi KA: 2way ANOVA</b>                     |                                   |                   |                                     |                   |
|                                                                            | Group comparison (Control vs. SE) |                   | Time comparison (72h, 5d, 10d, 28d) |                   |
|                                                                            | P value                           | F(DFn, DFd)       | P value                             | F(DFn, DFd)       |
| <i>Aif1</i>                                                                | **** P<0.0001                     | F (1, 12) = 46,54 | P=0.0533                            | F (2, 12) = 3,781 |

|                                                                            |               |                   |          |                   |
|----------------------------------------------------------------------------|---------------|-------------------|----------|-------------------|
| <i>Gfap</i>                                                                | **** P<0.0001 | F (1, 12) = 57,57 | P=0.0648 | F (2, 12) = 3,467 |
| Sidak's post hoc test: *p < 0.05, **p < 0.01, ***p < 0.001, ****p < 0.0001 |               |                   |          |                   |

Fig. 6D: lesion- vs. HS-TLE: Mann Whitney U-Test

| Group comparison (lesion vs. HS) |               |
|----------------------------------|---------------|
| P value                          |               |
| <i>Gfap</i>                      | **** P<0.0001 |
| <i>Aif1</i>                      | P=0.3107      |
| <i>Il1B</i>                      | P=0.2449      |
| <i>Il18</i>                      | P=0.4736      |
| <i>Nlrp3</i>                     | P=0.448       |
| <i>Casp1</i>                     | P=0.9511      |
| <i>Tlr4</i>                      | *P=0.0183     |
| <i>Nfkb2</i>                     | P=0.2449      |

Fig. Suppl. 1: ipsilateral SE vs. contralateral SE: 2way ANOVA

|              | Group comparison (ipsilateral SE KA vs. contralateral SE KA) |                    | Time comparison (72h, 5d, 10d, 28d) |                   |
|--------------|--------------------------------------------------------------|--------------------|-------------------------------------|-------------------|
|              | P value                                                      | F(DFn, DFd)        | P value                             | F(DFn, DFd)       |
| <i>Nlrp3</i> | P=0.649                                                      | F (1, 38) = 0.2109 | * P=0.0442                          | F (3, 38) = 2.963 |
| <i>Asc</i>   | P=0.377                                                      | F (1, 34) = 0.8015 | * P=0.0455                          | F (3, 34) = 2.970 |
| <i>Casp1</i> | P=0.484                                                      | F (1, 34) = 0.2561 | * P=0.0096                          | F (3, 34) = 4.459 |
| <i>Tlr4</i>  | P=0.834                                                      | F (1, 38) = 0.0446 | ** P=0.0024                         | F (3, 38) = 5.734 |
| <i>Nfkb2</i> | P=0.550                                                      | F (1, 34) = 0.3651 | ** P=0.0013                         | F (3, 34) = 6.564 |
| <i>Aif1</i>  | P=0.674                                                      | F (1, 26) = 0.1815 | * P=0.0218                          | F (2, 26) = 4.451 |
| <i>Gfap</i>  | P=0.087                                                      | F (1, 29) = 3.138  | ** P=0.0065                         | F (2, 29) = 6.013 |
| <i>Il1b</i>  | P=0.293                                                      | F (1, 31) = 1,145  | * P=0.0285                          | F (3, 31) = 3,446 |
| <i>Il18</i>  | P=0.092                                                      | F (1, 30) = 3.033  | *** P=0.0007                        | F (3, 30) = 7.411 |

Fig. Suppl. 2: correlation seizure frequency vs. gene expression: simple linear regression

|              | Pilo     |              |           | KA        |           |           |
|--------------|----------|--------------|-----------|-----------|-----------|-----------|
|              | P value  | F            | R squared | P value   | F         | R squared |
| <i>Nlrp3</i> | P=0.9720 | F = 0.001939 | 0.00194   | P=0.8849  | F=0.02685 | 0.0132    |
| <i>Tlr4</i>  | P=0.3773 | F = 2.205    | 0.688     | P=0.8878  | F=0.02552 | 0.0126    |
| <i>Il1b</i>  | P=0.7660 | F=0.148      | 0.129     | *P=0.0218 | F=44.34   | 0.957     |

Additional statistics on correlation between seizure frequency vs. gene expression: simple linear regression

|              | Pilo     |            |           | KA       |          |           |
|--------------|----------|------------|-----------|----------|----------|-----------|
|              | P value  | F          | R squared | P value  | F        | R squared |
| <i>Asc</i>   | P=0.7203 | F=0.221    | 0.181     | P=0.4280 | F=0.973  | 0.327     |
| <i>Casp1</i> | P=0.96   | F=0.00394  | 0.00394   | P=0.3116 | F=1.80   | 0.474     |
| <i>Nfkb2</i> | P=0.9882 | F=0.000345 | 0.000345  | P=0.4217 | F=1.00   | 0.334     |
| <i>Aif1</i>  | P=0.817  | F=0.0874   | 0.0803    | P=0.0774 | F=67.0   | 0.985     |
| <i>Gfap</i>  | P=0.7424 | F=0.183    | 0.155     | P=0.8465 | F=0.0605 | 0.057     |
| <i>Il18</i>  | P=0.0989 | F=40.8     | 0.976     | P=0.8728 | F=0.0329 | 0.016     |
